# Supplementary material
Source: Copernicus journal article supplement (doi:10.5194/egusphere-2026-1776)
Supplement: Supplementary file [file egusphere-2026-1776-AC1-supplement.pdf]

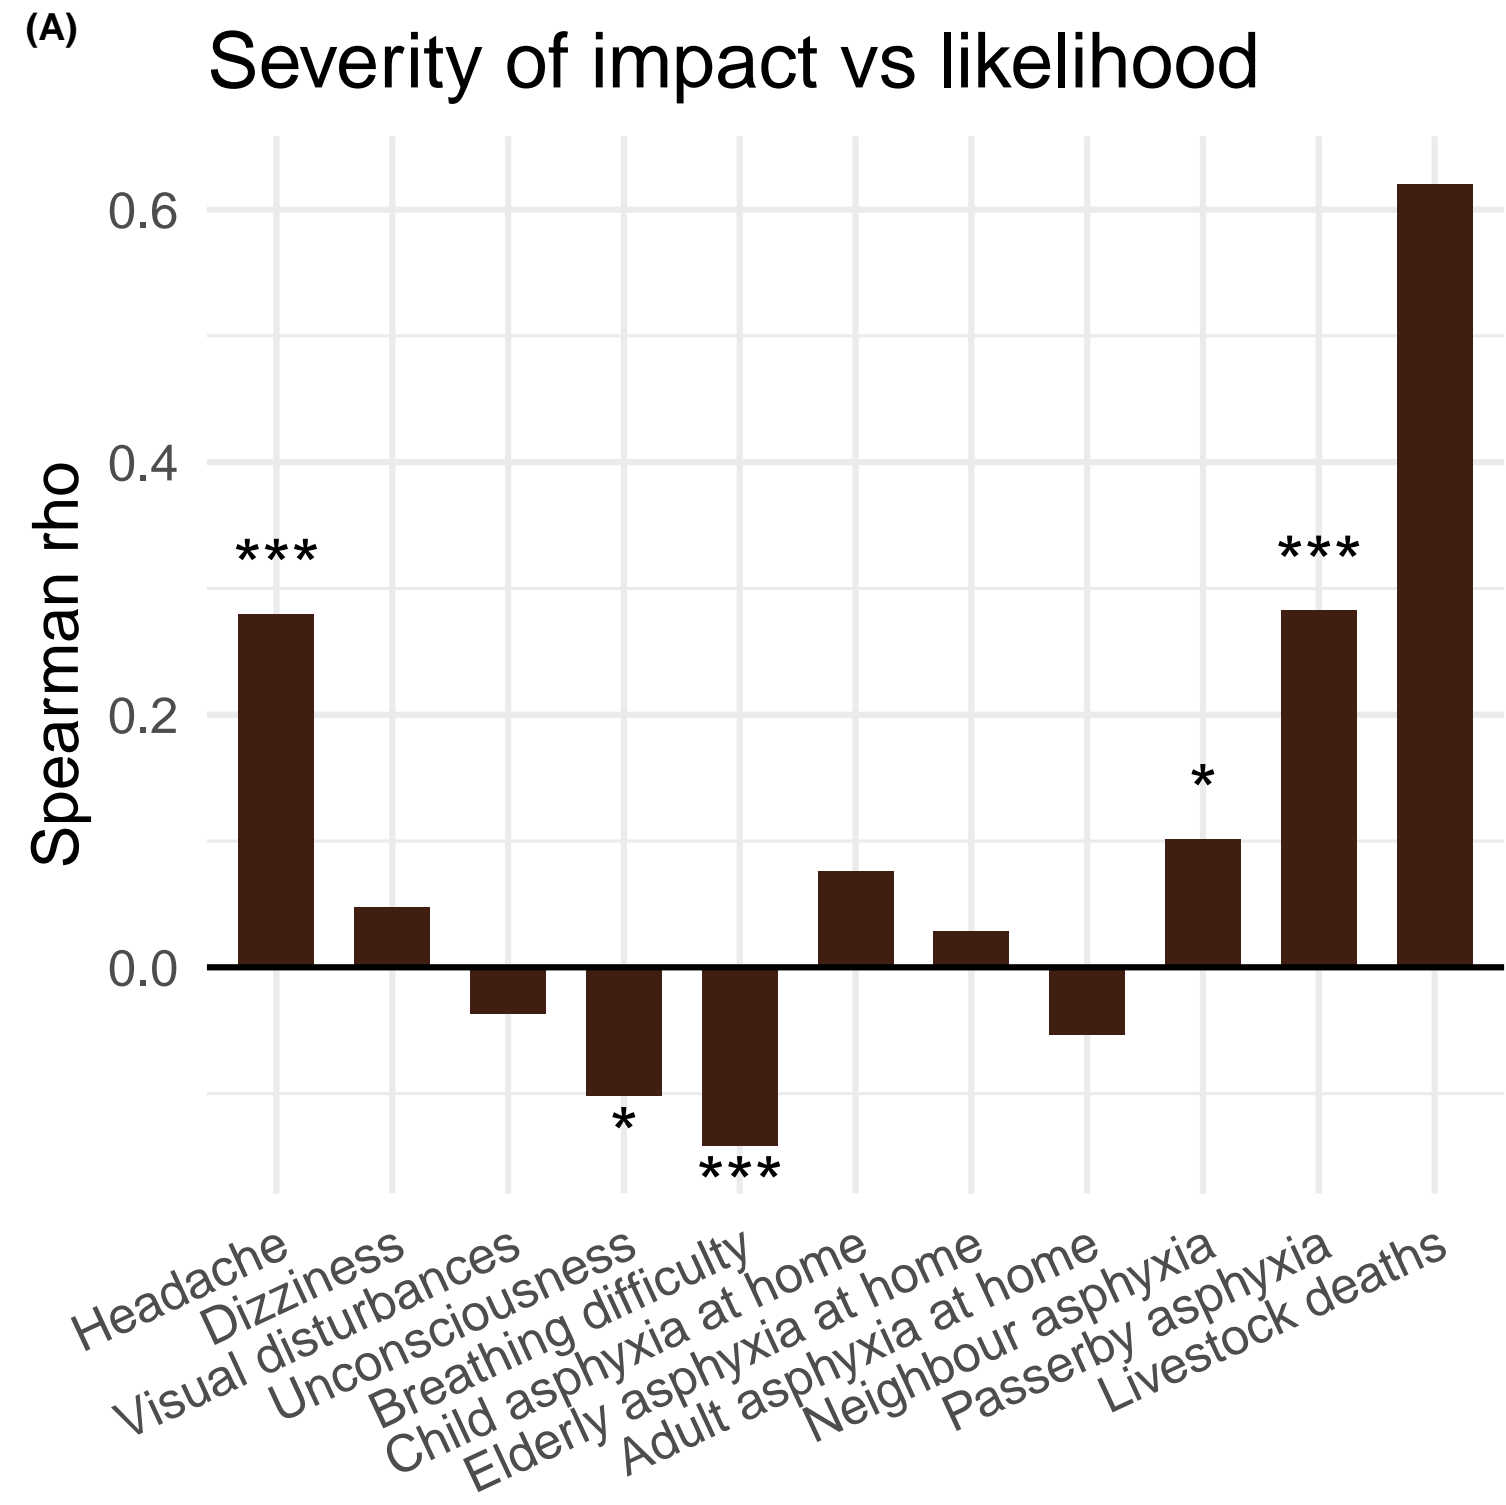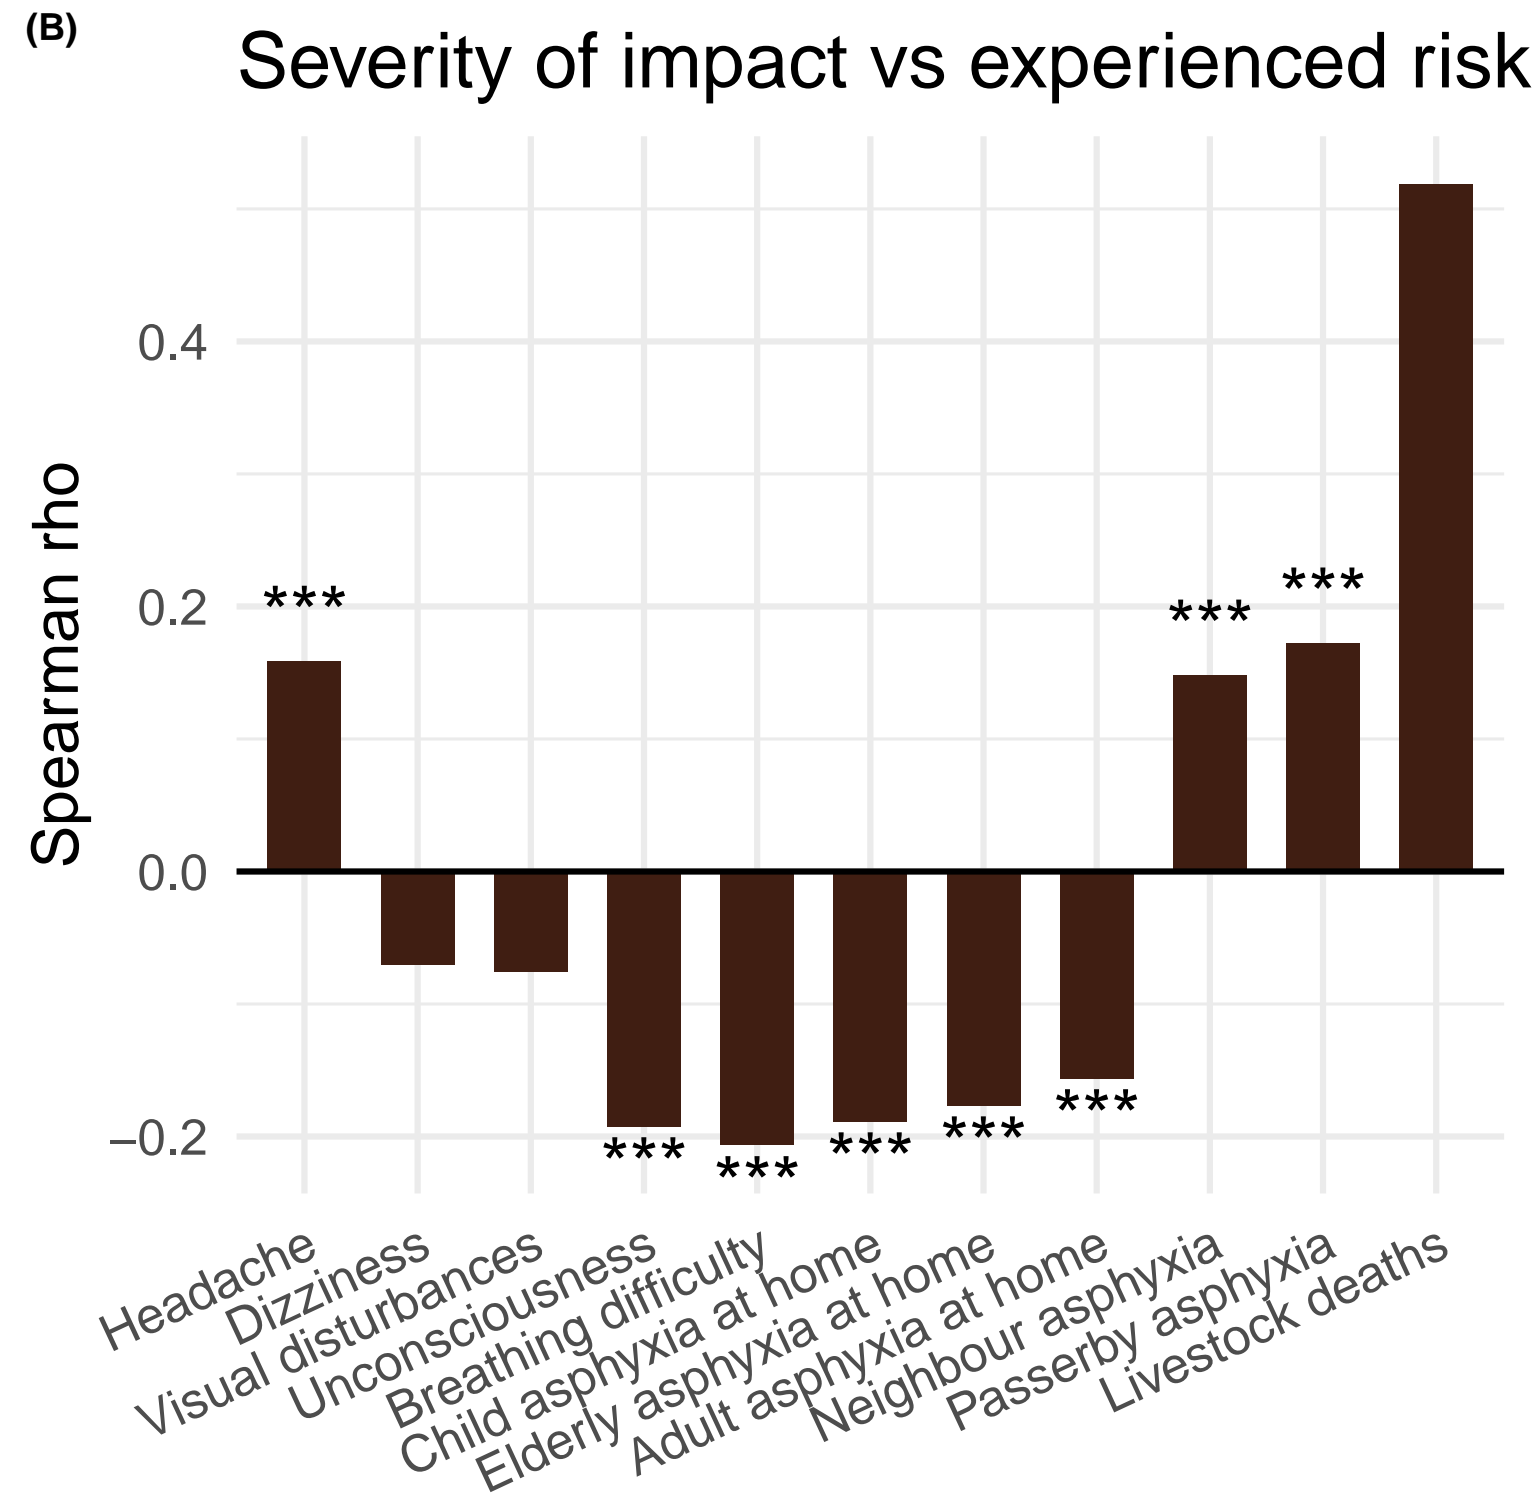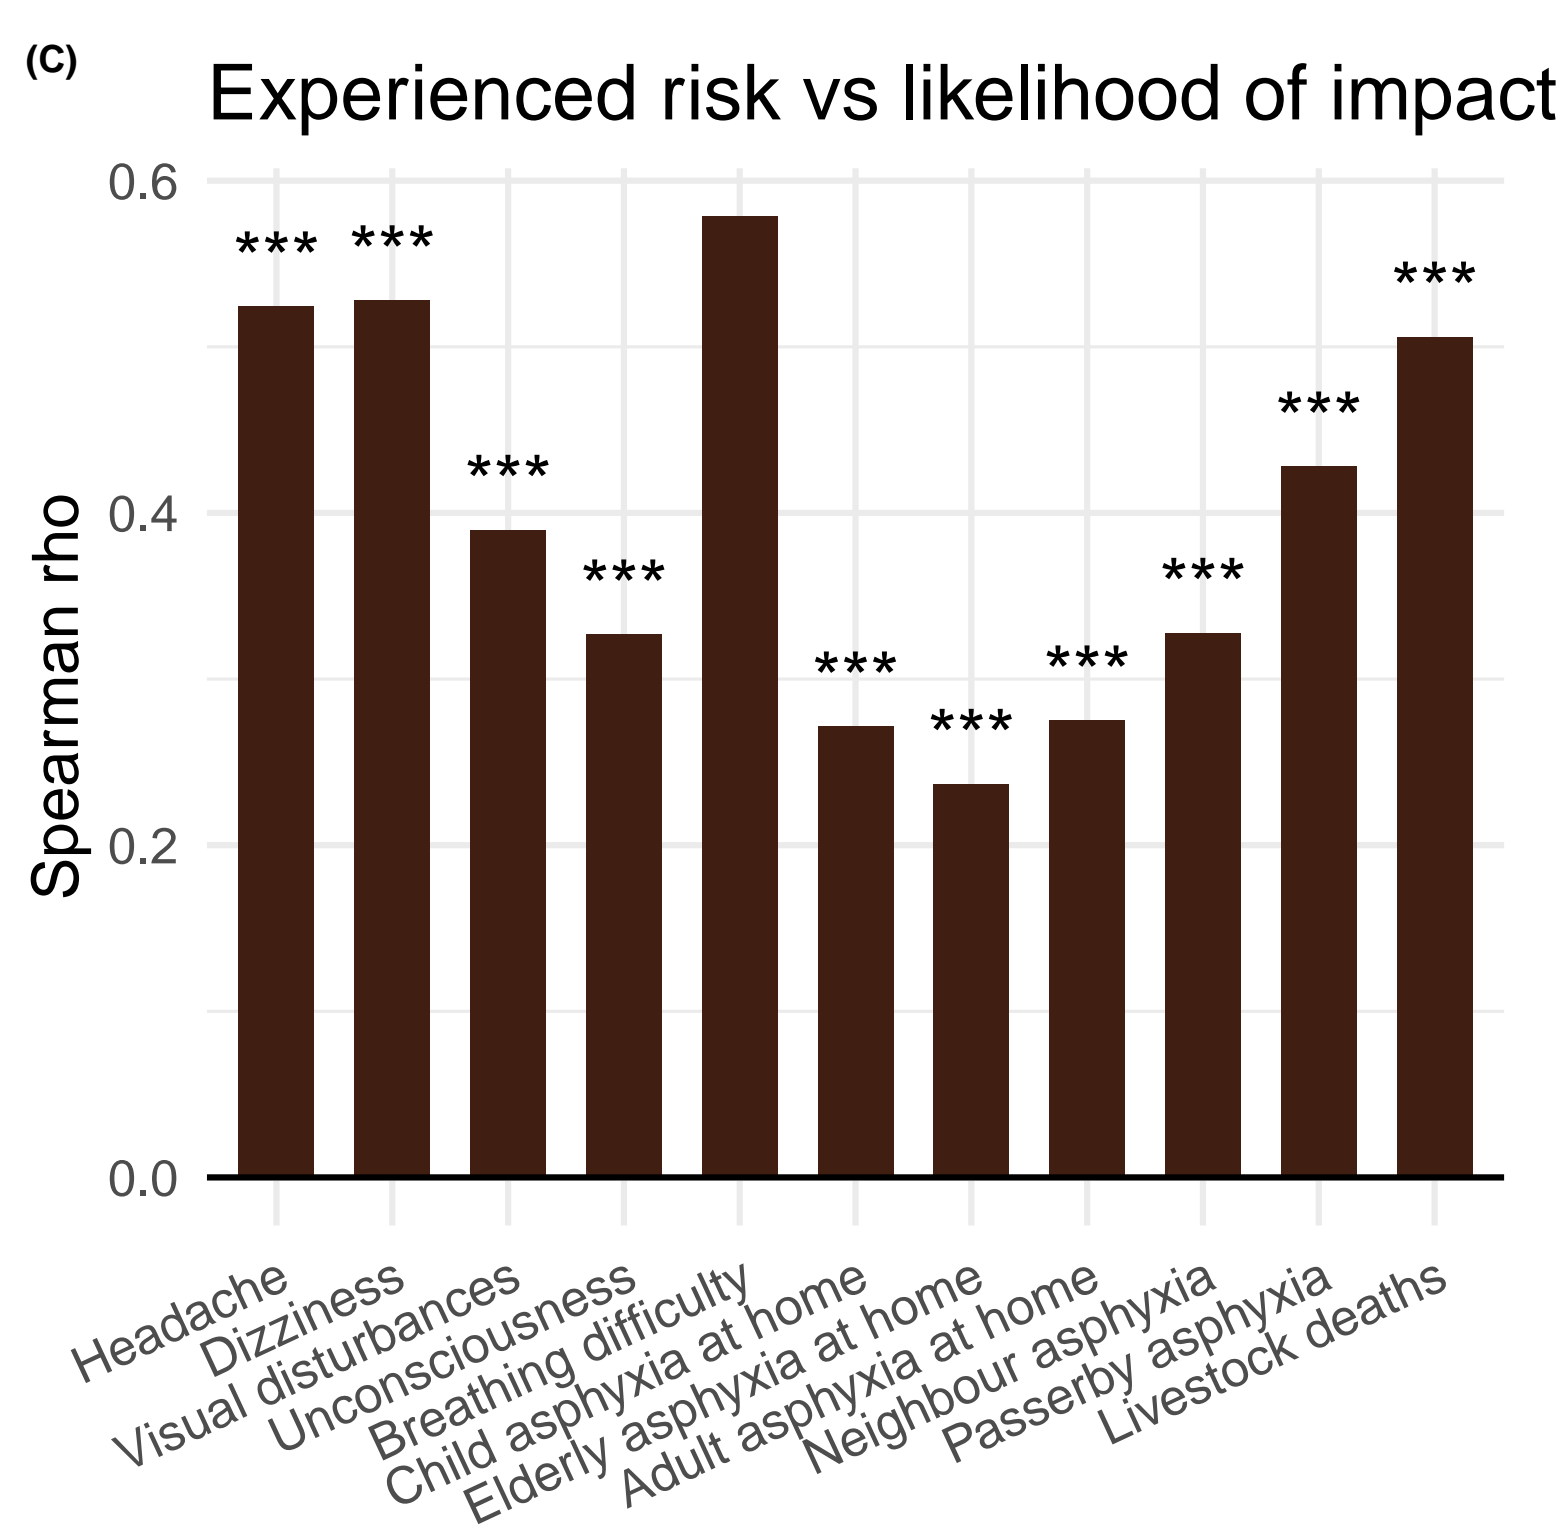

\*\*\*  $p < 0.001$  : very highly significant  
 \*\*  $p < 0.01$  : highly significant  
 \*  $p < 0.05$  : statistically significant  
 No star : not statistically significant
